# Supplementary material for: Au–ZnO hybrid nanoparticles exhibiting strong charge-transfer-induced SERS for recyclable SERS-active substrates
Source: Royal Society of Chemistry journal article supplement (doi:10.1039/c5nr00491h), 2015-01-01
Supplement: c5nr00491h1.pdf [file c5nr00491h1.pdf]

# Au-ZnO Janus Nanoparticle Exhibiting Strong Charge-Transfer-Induced SERS for Recyclable SERS-active Substrates

Liping Liu<sup>a,b</sup>, Haitao Yang<sup>\*a</sup>, Xiao Ren<sup>a</sup>, Yongfeng Li<sup>\*b</sup>, Xiangqun Zhang<sup>a</sup> and Zhaohua Cheng<sup>a</sup>

<sup>a</sup> Beijing National Laboratory for Condensed Matter Physics, Institute of Physics, Chinese Academy of Sciences, Beijing 100190, P. R. China

<sup>b</sup> State Key Laboratory of Heavy Oil Processing, China University of Petroleum, Beijing 102249, P. R. China.

## Supporting Information

### Synthesis of the etched Au-ZnO Janus nanoparticles

Au-ZnO nanopyramids were etched by acetic acid (pH~3) diluted with ethonal. 20 mL acetic acid solution and 20 mg Au-ZnO nanopyramids were mixed under continuous stirring at room temperature. Extracted samples at different times until the colour of the mixture changed from purple to blue.

### Characterizations of the etched Au-ZnO Janus nanoparticles

Inorder to obtain the nanoflower-shaped Au-ZnO nanoparticles, we observed the etching process by transmission electron microscopy (TEM). Fig. S1 show the TEM images of etched Au@ZnO nanopyramids with different time, 3 min, 6 min, 12 min, 18 min, 24 min, and 30 min, by acetic acid. Obviously, the ZnO shell was vanished gradually with etching time. After the etching treatment of 6 minutes, ZnO nanopyramids turn into the nanoflower shape and its size reduces to ~10 nm. Two or three flower-shaped ZnO NPs still decorate at one Au core. Powder X-ray diffraction (XRD) data were collected on a D2 PHASER X-ray diffractometer (Cu K $\alpha$  radiation,  $\lambda=0.154$  nm). Fig. S2 shows that the XRD pattern of etched Au-ZnO Janus nanoparticles was the same as the Au-ZnO nanopyramids. It demonstrates that no impurity has been induced in the sample after etching.

### Raman spectra of PATP solid powders

We measured the Raman spectrum of PATP solid powders by a Via-Reflex spectrometer with 532 nm radiation from a solid-state laser. The predominant bands in the spectrum of PATP solid powders (Fig. S3) are located at 1593, 1176, and 1086 cm<sup>-1</sup>.

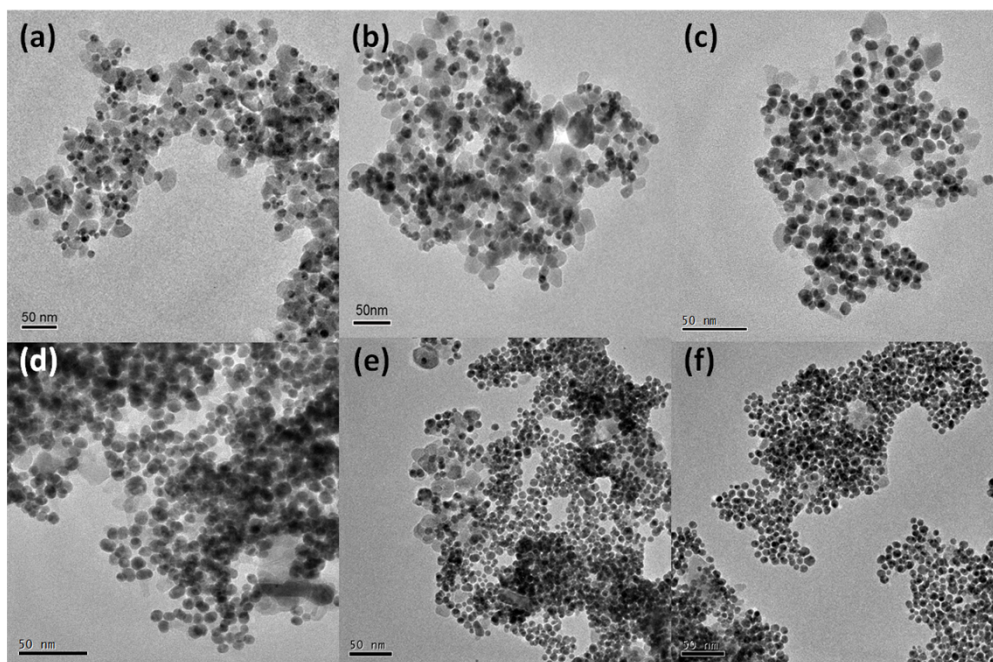

**Fig. S1** TEM images of etched Au@ZnO nanopyrramids with different time (a) 3 min. (b) 6 min (c) 12 min (d) 18 min (e) 24 min, and (f) 30 min, by acetic acid (pH~3).

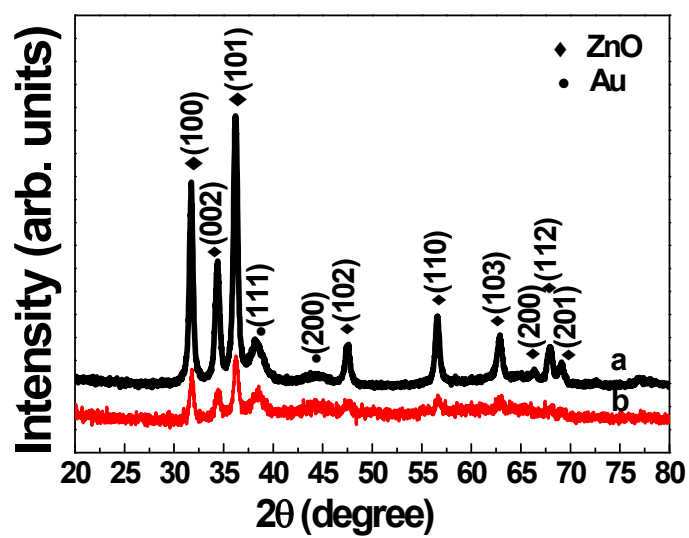

**Fig. S2** XRD patterns of (a) the Au@ZnO nanopyrramids, and (b) the etched Au/ZnO nanoparticles.

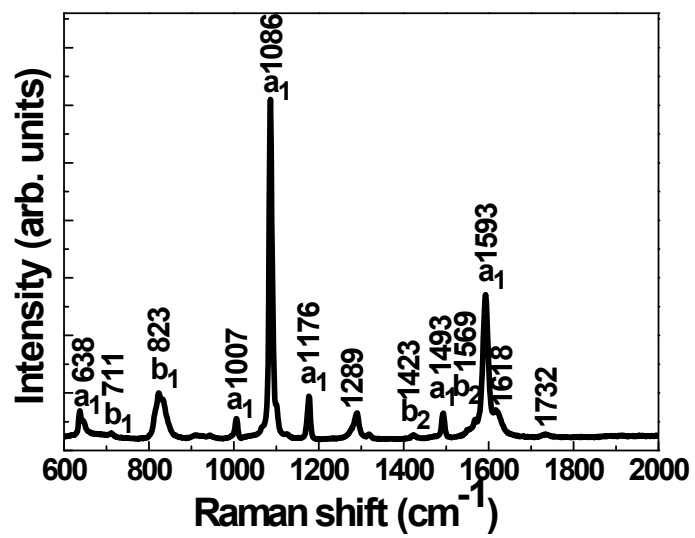

Fig. S3 Raman spectra of PATP solid powders with 532 nm laser excitation.
